# Supplementary material
Source: publisher figshare collection journal article supplement (https://tandf.figshare.com/ndownloader/files/22131705)
Supplement: Supplementary file 1 [file 22131705]

**Supplemental Table S1:** Sample questions from interview guide.

| 1. As a person living with chronic pain, what comes to mind when you hear the words community-based exercise? 2. What do you perceive is the role of community-based exercise for yourself and other people living with chronic pain? 3. Where should community-based exercise be offered for yourself and other people living with chronic pain? 4. How should community-based exercise be delivered for yourself and other people living with chronic pain? 5. What would the ideal community-based exercise program look like for yourself and other people living with chronic pain? 6. How would you prefer that healthcare providers encourage participation in community-based exercise opportunities for yourself and other people living with chronic pain? 7. What makes, or would make it hard for you (e.g. barriers) to participate in community-based exercise? 8. What makes, or would make it easier (e.g. facilitators) to participate in community-based exercise? 9. What are the most important factors that influence, or would influence, your participation in community-based exercise? 10. Is there anything else you would like to share about community-based exercise opportunities for yourself or other people living with chronic pain? |
| --- |
